# Supplementary material for: A hollow titanium oxynitride nanorod array as an electrode substrate prepared by the hot ammonia-induced Kirkendall effect
Source: Royal Society of Chemistry journal article supplement (doi:10.1039/c4ta01469c), 2014-01-01
Supplement: c4ta01469c1.pdf [file c4ta01469c1.pdf]

## ***Supporting Information***

# Hollow titanium oxynitride nanorod array for electrode substrate prepared by hot NH<sub>3</sub>-induced Kirkendall effect

*Jae Hee Han<sup>a</sup> and Jin Ho Bang<sup>\*a,b</sup>*

Department of Bionanotechnology and Department of Chemistry and Applied Chemistry, Hanyang University, 55 Hanyangdaehak-ro, Sangnok-gu, Ansan, Kyeonggi-do 426-791, Republic of Korea

Email: jbang@hanyang.ac.kr

<sup>a</sup> Department of Bionanotechnology

<sup>b</sup> Department of Chemistry and Applied Chemistry

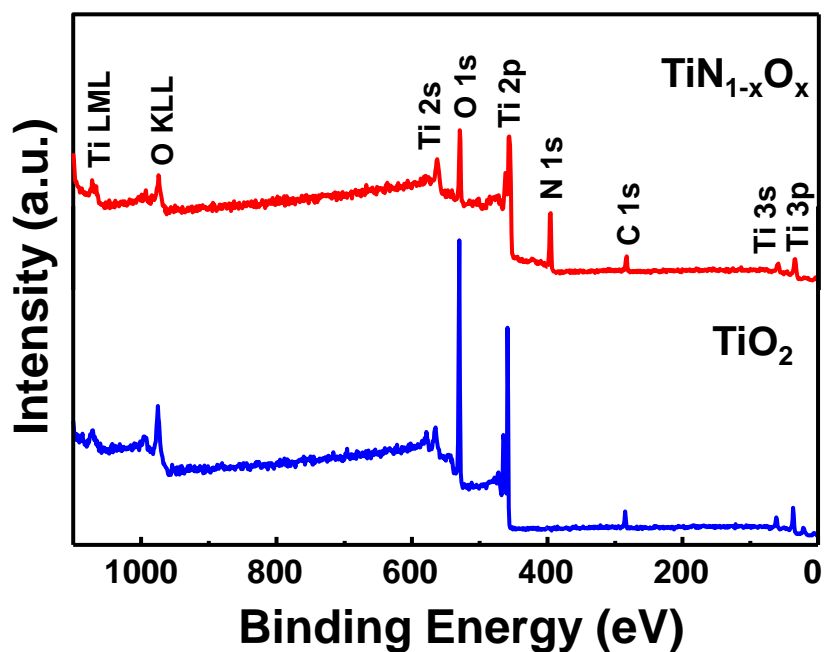

**Fig. S1** XPS survey spectra of  $\text{TiN}_{1-x}\text{O}_x$  and  $\text{TiO}_2$ .

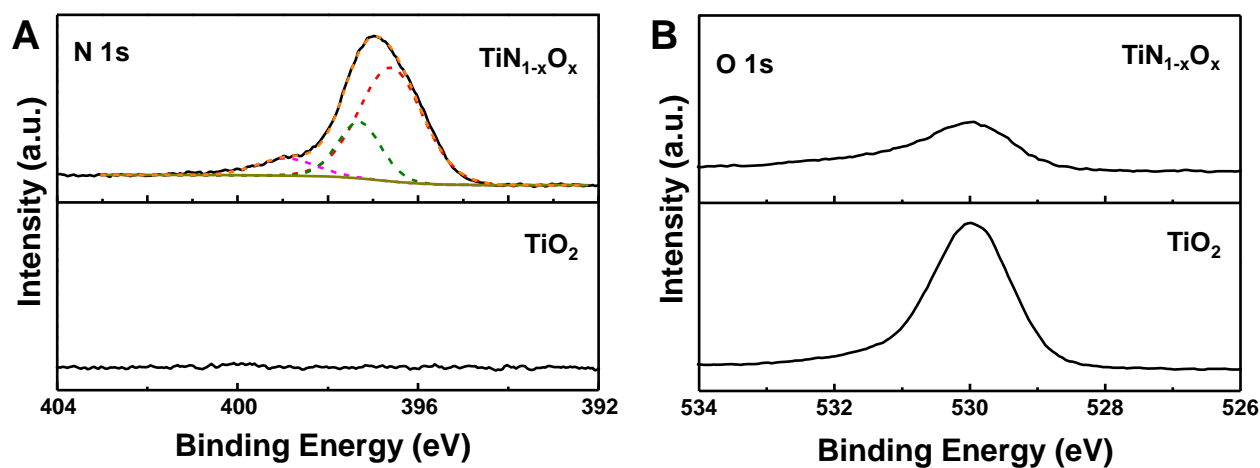

**Fig. S2** XPS spectra of (A) N1s (solid black line: original data, dotted orange line: fitted data, solid dark yellow line: background, dotted orange line: nitridic N, dotted green line: oxynitridic N, and dotted pink line: chemisorbed atomic N-like species) and (B) O 1s from  $\text{TiN}_{1-x}\text{O}_x$  and  $\text{TiO}_2$ .

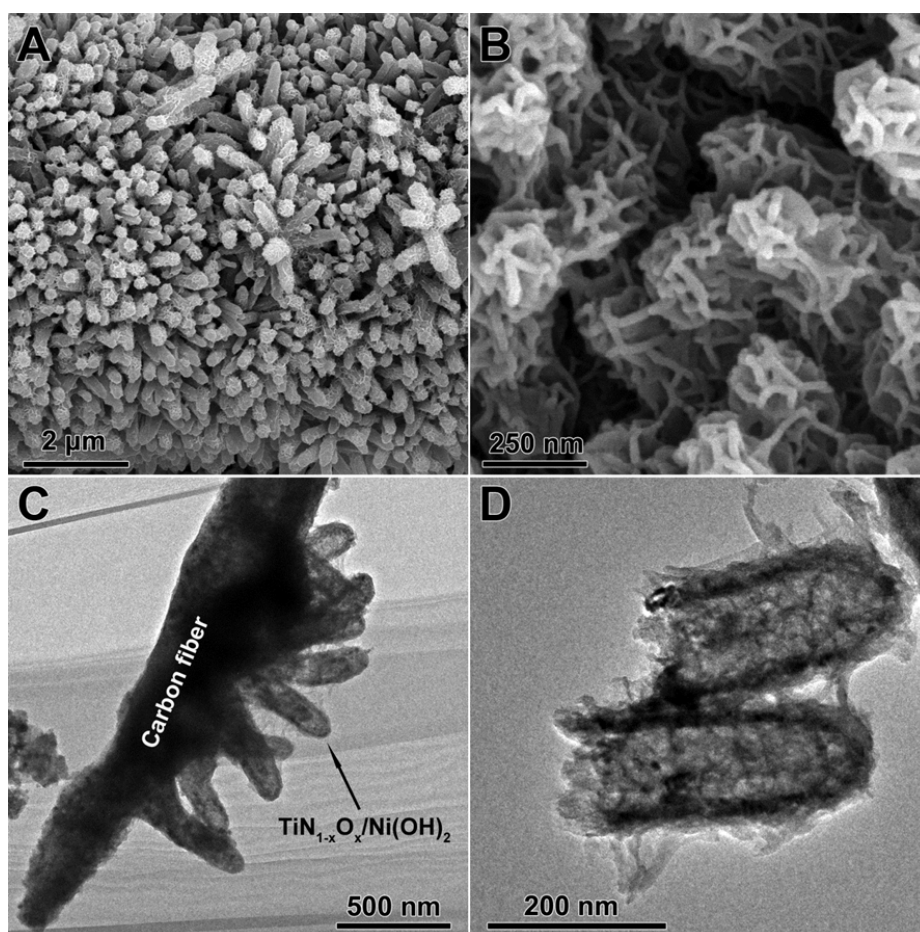

**Fig. S3** SEM and TEM images of CFP/TiN<sub>1-x</sub>O<sub>x</sub>/Ni(OH)<sub>2</sub> electrode.

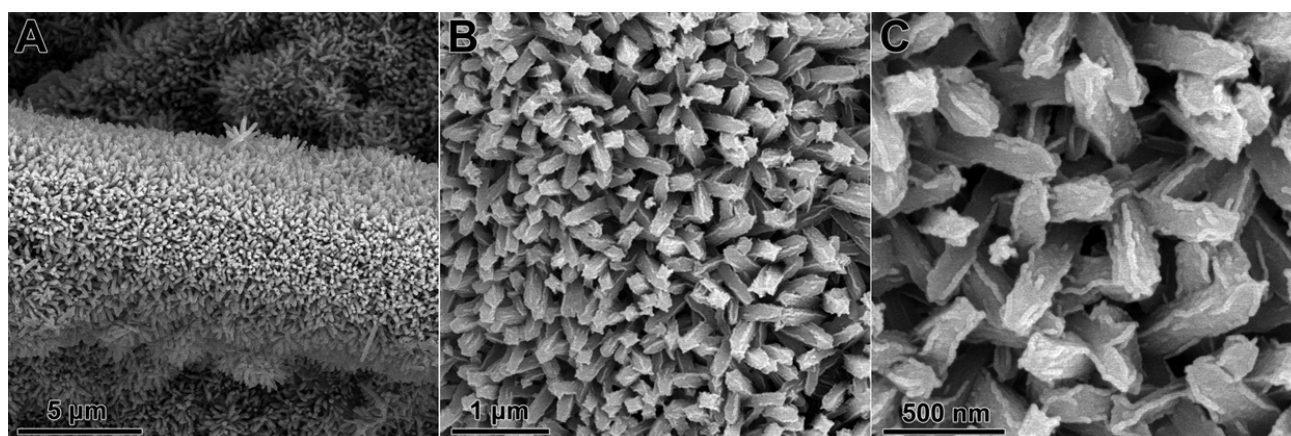

**Fig. S4** SEM images of CFP/TiO<sub>2</sub>/Ni(OH)<sub>2</sub> electrode.

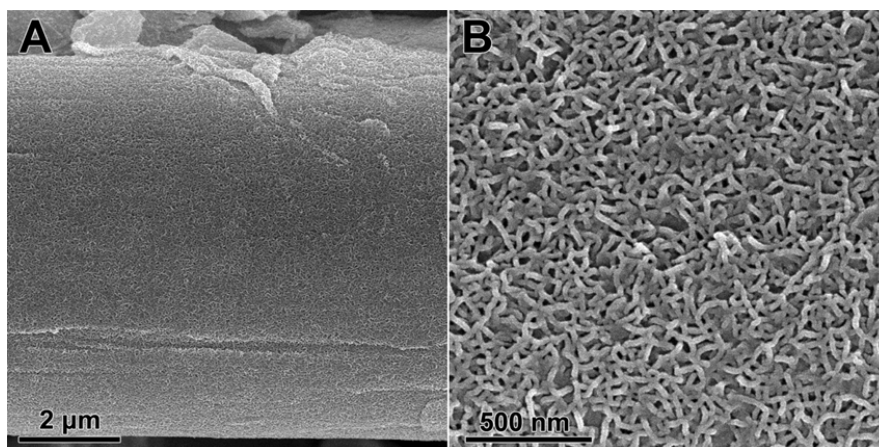

**Fig. S5** SEM images of CFP/Ni(OH)<sub>2</sub> electrode.

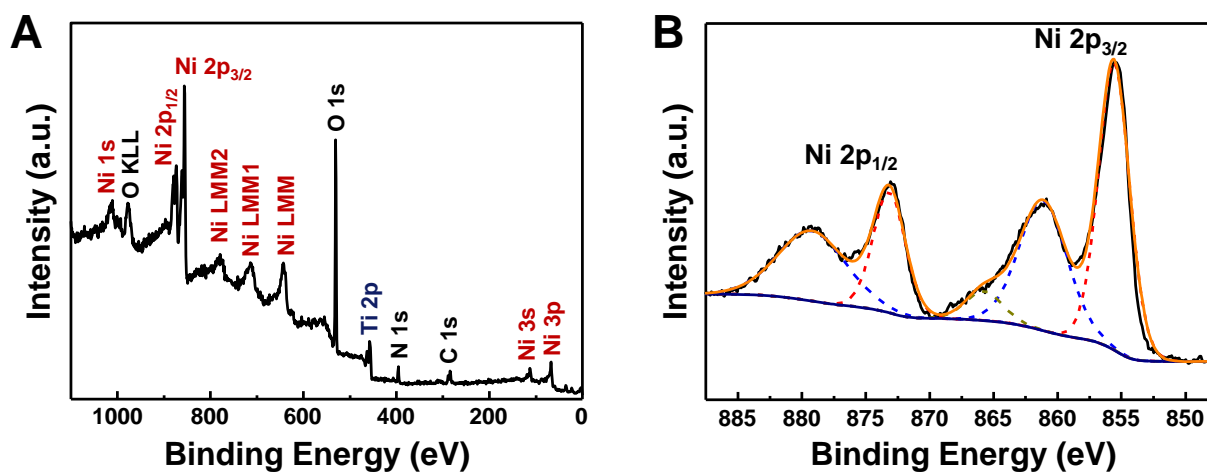

**Fig. S6** (A) XPS survey spectra of CFP/TiN<sub>1-x</sub>O<sub>x</sub>/Ni(OH)<sub>2</sub> electrode and (B) XPS spectra of Ni 2p.

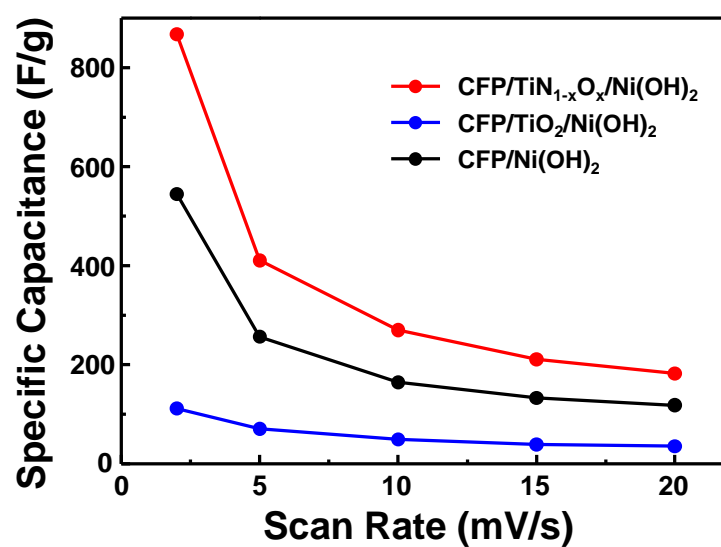

**Fig. S7** Gravimetric capacitance of CFP/TiN<sub>1-x</sub>O<sub>x</sub>/Ni(OH)<sub>2</sub>, CFP/TiO<sub>2</sub>/Ni(OH)<sub>2</sub>, and CFP/Ni(OH)<sub>2</sub> electrodes at various scan rates. Note that only the weight of CFP was excluded from the total mass of active materials.

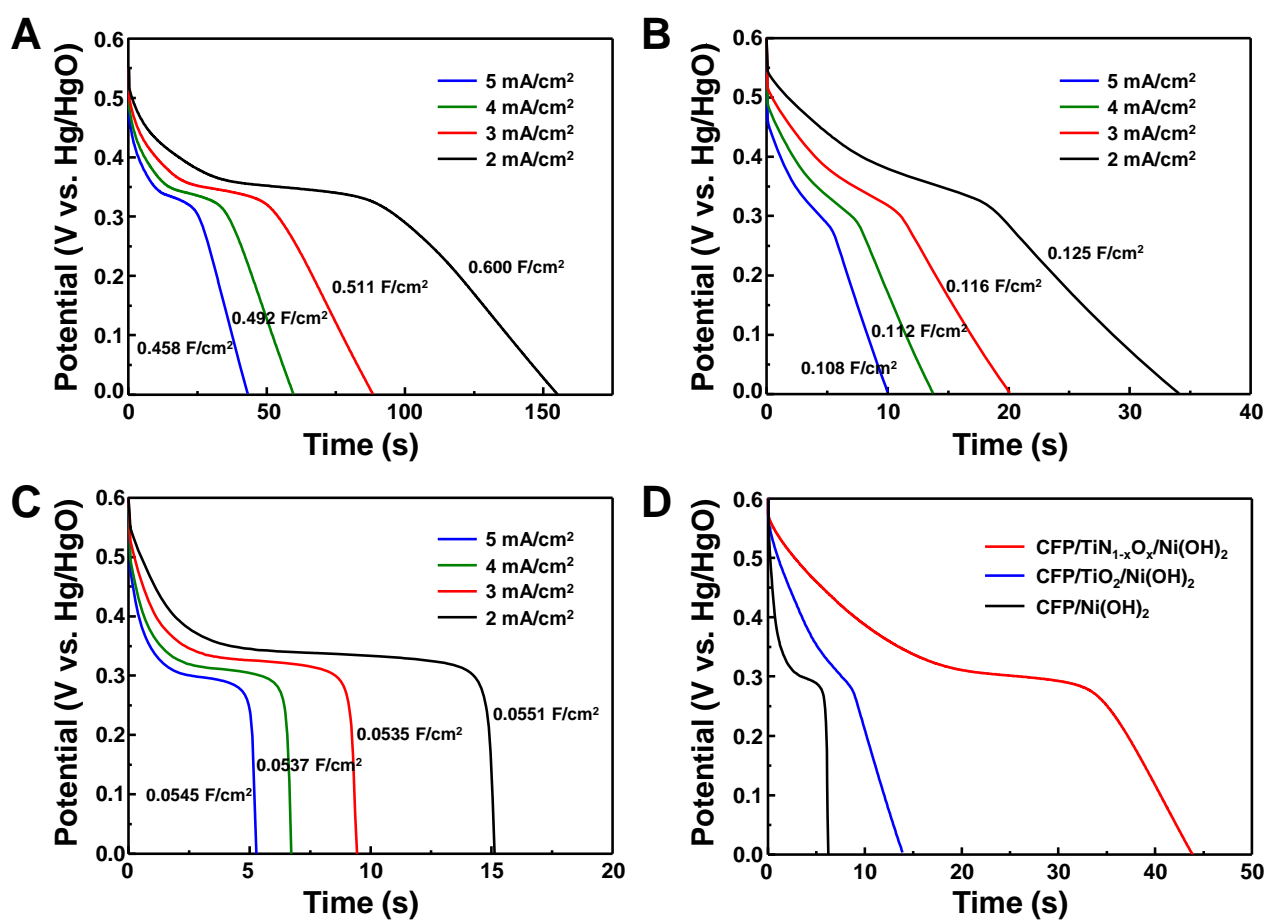

**Fig. S8** Galvanostatic discharge curves of (a) CFP/TiN<sub>1-x</sub>O<sub>x</sub>/Ni(OH)<sub>2</sub>, (b) CFP/TiO<sub>2</sub>/Ni(OH)<sub>2</sub>, and (c) CFP/Ni(OH)<sub>2</sub> electrodes at various current densities; (d) comparison of the galvanostatic discharge curves of CFP/TiN<sub>1-x</sub>O<sub>x</sub>/Ni(OH)<sub>2</sub>, CFP/TiO<sub>2</sub>/Ni(OH)<sub>2</sub>, and CFP/Ni(OH)<sub>2</sub> electrodes obtained at 5 mA/cm<sup>2</sup>.

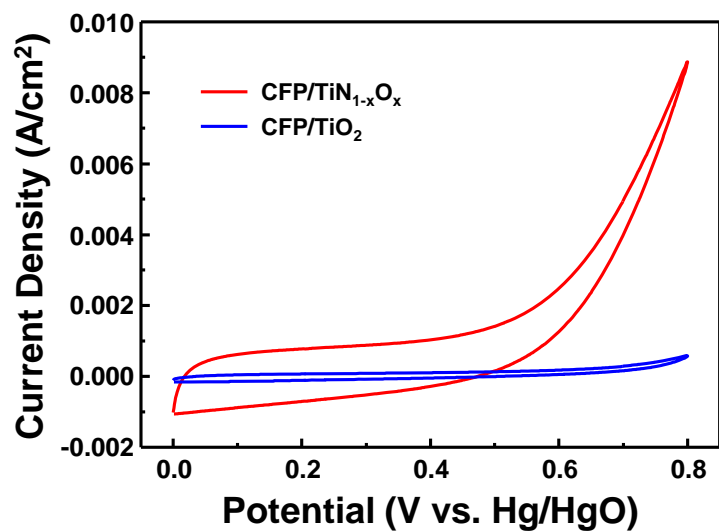

**Fig. S9** Cyclic voltamograms of CFP/TiN<sub>1-x</sub>O<sub>x</sub> and CFP/TiO<sub>2</sub> electrodes at a scan rate of 10 mV/s in 1 M KOH electrolyte.

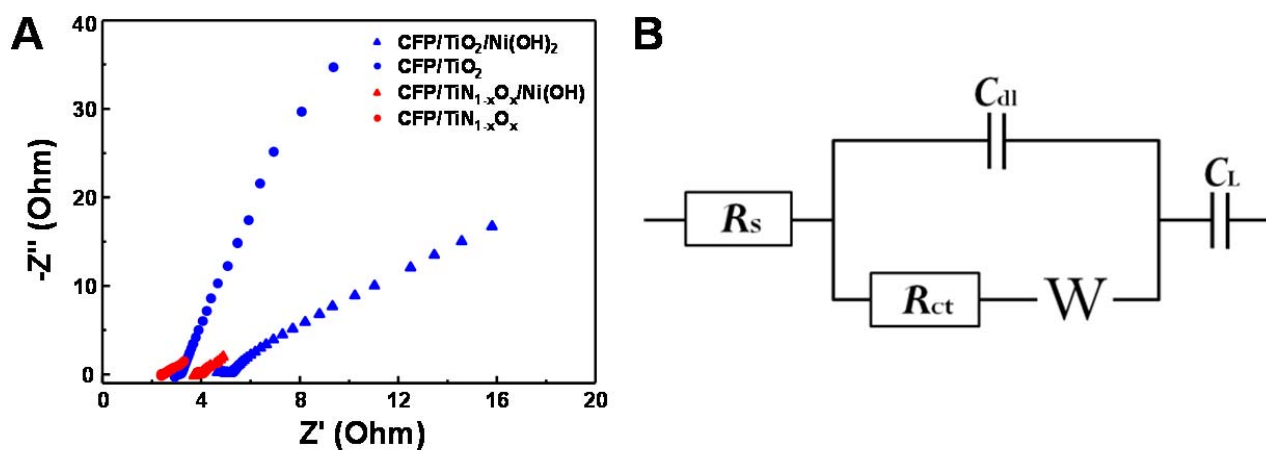

**Fig. S10** (A) EIS of CFP/TiN<sub>1-x</sub>O<sub>x</sub>/Ni(OH)<sub>2</sub>, CFP/TiN<sub>1-x</sub>O<sub>x</sub>, CFP/TiO<sub>2</sub>/Ni(OH)<sub>2</sub>, CFP/TiO<sub>2</sub> electrodes and (B) an equivalent circuit employed to fit the EIS spectra ( $R_s$ : ohmic serial resistance,  $R_{ct}$ : charge-transfer resistance,  $W$ : Warburg impedance,  $C_{dl}$ : double-layer capacitor, and  $C_L$ : limit capacitor)

**Table S1.** Equivalent circuit parameters fitted from Nyquist plots

|                                                            | $R_s$ ( $\Omega$ ) | $R_{ct}$ ( $\Omega$ ) | $W$ ( $\Omega$ ) | $C_{dl}$ (F)          | $C_L$ (F)             |
|------------------------------------------------------------|--------------------|-----------------------|------------------|-----------------------|-----------------------|
| CFP/TiN <sub>1-x</sub> O <sub>x</sub> /Ni(OH) <sub>2</sub> | 3.78               | 0.134                 | 1.7              | $3.33 \times 10^{-4}$ | 0.122                 |
| CFP/TiO <sub>2</sub> /Ni(OH) <sub>2</sub>                  | 4.49               | 0.515                 | 11.1             | $5.35 \times 10^{-6}$ | $7.46 \times 10^{-3}$ |

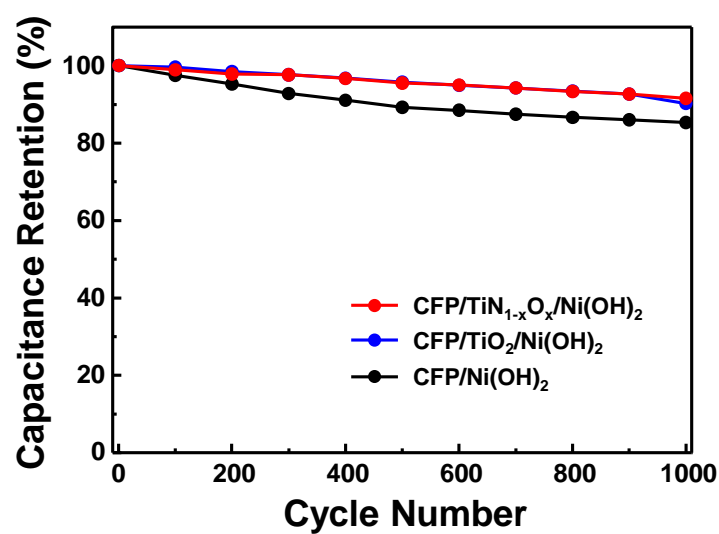

**Fig. S11** Long-term cycling performance of CFP/TiN<sub>1-x</sub>O<sub>x</sub>/Ni(OH)<sub>2</sub>, CFP/TiO<sub>2</sub>/Ni(OH)<sub>2</sub>, and CFP/Ni(OH)<sub>2</sub> electrodes implemented at 100 mV/s.
